# Supplementary material for: Circuit-based neuromodulation enhances delayed recall in amnestic mild cognitive impairment
Source: HighWire-hosted journal article supplement (doi:10.1136/jnnp-2023-333152), 2024-03-19
Supplement: jnnp-2023-333152supp003_data_supplement.pdf [file jnnp-2023-333152supp003_data_supplement.pdf]

### 1 **Supplementary Material 3**

2 Clinical data include Hamilton anxiety scale (HAMA), Hamilton depression scale  
3 (HAMD) <sup>1</sup> and functional activities questionnaire (FAQ)<sup>2</sup>. Neuropsychological  
4 evaluations include mini-mental state examination (MMSE) <sup>3</sup>, AVLT<sup>4</sup>, shape trails test  
5 (STT) <sup>5</sup>, symbol digit modalities test (SDMT) <sup>6</sup>, Boston naming test (BNT) <sup>7</sup>, and  
6 complex figure test (CFT)<sup>8</sup>. The evaluation details are as follows<sup>9</sup>:

#### 7 **Hamilton Anxiety Scale (HAMA)**

8 This test includes 14 items: 1 Anxious mood; 2 Tension; 3 Fears; 4 Insomnia; 5  
9 Intellectual retardation; 6 Depressed mood; 7 General somatic symptoms (muscular);  
10 8 General somatic symptoms (sensory); 9 Cardiovascular symptoms; 10 Respiratory  
11 symptoms; 11 Gastrointestinal symptoms; 12 Genito-urinary symptoms; 13  
12 Autonomic symptoms; 14 Behavior at interview. Each item is divided into 5 levels: 0-  
13 asymptomatic; 1 mild; 2 moderate; 3 severe; 4 extremely severe. Total scale score  
14 (items 1-14) is 56. No anxiety:0~7; Possible anxiety:7~14; There must be anxiety:  
15 14~21; There must be obvious anxiety: 21~29; Severe anxiety: >29.

16

#### 17 **Hamilton Depression Scale (HAMD)**

18 This test includes 24 items: 1 Depressed mood; 2 Guilt feelings; 3 Suicidal thoughts;  
19 4 Initial insomnia (difficulty falling asleep);5 Middle insomnia (sleeping lightly); 6  
20 Early morning awakening; 7 Work and interests; 8 Psychomotor retardation (refers to  
21 slowed thinking and speech, difficulty concentrating, reduced initiative); 9 Agitation;  
22 10 Psychological anxiety; 11 Somatic anxiety (refers to physiological symptoms of  
23 anxiety, including dry mouth, abdominal bloating, diarrhea, hiccups, abdominal  
24 cramps, palpitations, headache, hyperventilation and sighing, frequent urination, and  
25 sweating); 12 Gastrointestinal symptoms; 13 General somatic symptoms; 14 Sexual  
26 symptoms (such as decreased libido and menstrual irregularities); 15 Hypochondriasis;  
27 16 Loss of weight; 17 Insight (self-awareness); 18 Diurnal variation (if symptoms  
28 worsen in the morning or evening, specify which, and rate the degree of variation); 19  
29 Depersonalization or derealization (feeling unreal or having delusions of unreality);

30 20 Paranoid symptoms; 21 Obsessive symptoms (obsessive thoughts and compulsive  
31 behaviors); 22 Feeling of incapacity; 23 Hopelessness; 24 Self-esteem feelings. Each  
32 item is divided into 5 levels: 0- asymptomatic; 1 mild; 2 moderate; 3 severe; 4  
33 extremely severe. Normal:0~8; Possible depression: 8~20; Diagnosed depression:  
34 21~35; Severe depression:>35.

35

#### 36 **Functional Activities Questionnaire (FAQ)**

37 FAQ reflecting daily living abilities. This FAQ includes a total of 10 questions, with  
38 each question encompassing two dimensions: accuracy and completion speed. Each  
39 dimension consists of five levels, represented as 0, 1, 2, 3, and 9. A score of 9  
40 indicates that the task is not applicable or cannot be completed.

41

#### 42 **Mini-Mental State Examination (MMSE)**

43 This test is similar to the English language version of the MMSE, and is scored out of  
44 30.

45

#### 46 **Auditory Verbal Learning Test (AVLT)**

47 The examiner read out 12 two-character words. Each group of 12 words contained  
48 three different categories with four words in each. The different word types were  
49 presented randomly with 1-s intervals between the words. Immediately after the entire  
50 list had been presented, the participant was asked to recall the words. This learning  
51 and recall phase were repeated three times. The participant was given a 5-min  
52 non-verbal test, and was then asked to recall the 12 words for the fourth time. Next,  
53 the participant completed another 20-min non-verbal task, and was then asked to  
54 recall the word list for the fifth time (AVLT-long delayed recall, AVLT-LR or  
55 AVLT-N5). Finally, the participant was shown the word list.

56

#### 57 **Shape Trails Test (STT)**

58 The shape trails test parts A and B: in the STT-A, the participant is asked to connect a

59 series of Arabic numbers (1-25) in their numerical order. In the Chinese version of the  
60 STT-B, Arabic digits (1-25) are surrounded by either a square or a circle, and the  
61 participant is asked to connect the digits in a sequence such that the shapes  
62 surrounding the digits alternate. We recorded the time taken to complete the task.

63

#### 64 **Symbol Digit Modalities Test (SDMT)**

65 In this test, the participant was asked to match a series of symbols to corresponding  
66 digits according to a symbol-digit pairing illustration. We recorded the number of  
67 items

68 correctly completed within 90 s. After 90 s, the participant was asked to recall the  
69 symbols that corresponded to each digit [known as SDMT-incidental learning  
70 (SDMT-IL); i.e., participants were not told in advance that they would be asked to  
71 recall the information].

72

#### 73 **Boston Naming Test (BNT) (30-item version)**

74 In this test, the participants were asked to name the subjects of 30 pictures with no  
75 time limit; the total possible score was 30.

76

#### 77 **Complex Figure Test (CFT)**

78 Participants were asked to copy a visual figure (CFT-copy), then to draw the figure  
79 from memory after approximately 25 min had passed (CFT-delayed recall, CFTLR).

80 We used the scoring standard established by Taylor in 1981, with a total possible  
81 score of 36.

82

#### 83 **Quality Control of Data Collection**

84 Ensuring the accuracy and reliability of our data is of utmost importance to us, and we  
85 took several steps to maintain high standards of quality control:

86 1) Dual independent data entry: To mitigate the risk of data entry errors, we adopted  
87 a dual-entry system. This involved two distinct operators entering the same data

88 independently, with any discrepancies being identified and rectified through a  
89 rigorous verification process.

90 2) Specialized training for data entry staff: Our team underwent a comprehensive  
91 training regimen that covered both the use of our data entry software and a deep dive  
92 into the cognitive assessments and scales utilized in our study, ensuring their  
93 understanding of the significance, scoring ranges, and coding rules for each scale.

94 3) Systematic quality assurance procedures: We periodically sampled entered data  
95 for quality checks, comparing them against original records to ensure accuracy. This  
96 process allowed us to maintain continuous oversight and implement immediate  
97 corrections where necessary.

98 4) Continuous process evaluation: The data entry process was subject to ongoing  
99 evaluation through regular review meetings. These meetings allowed our team to  
100 address any challenges promptly and refine our data entry methodologies as needed.

101 5) Comprehensive audit trails: The audit trail functionality of our data entry system  
102 documented every action, from initial data entry to subsequent modifications. This  
103 level of transparency and traceability was instrumental in ensuring the integrity of our  
104 data entry process.

105

106 Table S3-1. Normal range of score for each cognitive function assessment scale.

| Indicators           | Age Group |       |       |
|----------------------|-----------|-------|-------|
|                      | 50-59     | 60-69 | 70-79 |
| HAMD                 |           | 8     |       |
| HAMA                 |           | 7     |       |
| MMSE                 |           | 24    |       |
| AVLT                 | 24        | 22    | 19    |
| AVLT_N5              | 5         | 4     | 3     |
| BNT                  |           | 22    |       |
| STT_B, Middle School | 180       | 200   | 260   |
| STT_B, University    | 180       | 190   | 220   |
| SDMT_correct         |           | 34    |       |
| CFT_copy             | 33        | 31    | 30    |

107 AVLT: Auditory verbal learning test; AVLT\_N5: Auditory verbal learning test, long-term delay  
108 recall; BNT: Boston naming test; HAMA: Hamilton Anxiety Scale; HAMD: Hamilton depression  
109 scale; MMSE: Mini-Mental State Examination; STT\_B: Shape trails test, part B; SDMT\_correct:

110 Symbol digit modalities test, correct number; CFT\_copy: Complex figure test, copy part.

111

112 In our study, individuals participate in daily low-intensity walking exercises. Sleep  
113 duration was determined according to the following two questions<sup>10</sup>: (1) How many  
114 minutes of actual sleep on average did you get at night (this may be shorter than the  
115 number of hours you spent in bed) during the past 6 months? (2) How many minutes  
116 on average did you take a nap after lunch during the past 6 months?

117

## 118 **References**

119 1. Maier W, Buller R, Philipp M, Heuser I. The Hamilton Anxiety Scale: reliability, validity and  
120 sensitivity to change in anxiety and depressive disorders. *Journal of affective disorders* 1988;

121 **14**(1): 61-8.

122 2. Marshall GA, Zoller AS, Lorus N, et al. Functional Activities Questionnaire Items that Best  
123 Discriminate and Predict Progression from Clinically Normal to Mild Cognitive Impairment.  
124 *Curr Alzheimer Res* 2015; **12**(5): 493-502.

125 3. Folstein MF, Folstein SE, McHugh PR. "Mini-mental state". A practical method for grading  
126 the cognitive state of patients for the clinician. *J Psychiatr Res* 1975; **12**(3): 189-98.

127 4. Zhao Q, Guo Q, Liang X, et al. Auditory Verbal Learning Test is Superior to  
128 Rey-Osterrieth Complex Figure Memory for Predicting Mild Cognitive Impairment to  
129 Alzheimer's Disease. *Current Alzheimer research* 2015; **12**(6): 520-6.

130 5. Zhao Q, Guo Q, Li F, Zhou Y, Wang B, Hong Z. The Shape Trail Test: application of a  
131 new variant of the Trail making test. *PloS one* 2013; **8**(2): e57333.

132 6. Wang B, Guo Q, Zhao Q, Hong Z. Memory deficits for non-amnesic mild cognitive  
133 impairment. *Journal of neuropsychology* 2012; **6**(2): 232-41.

- 134 7. Mack WJ, Freed DM, Williams BW, Henderson VW. Boston Naming Test: shortened  
135 versions for use in Alzheimer's disease. *Journal of gerontology* 1992; **47**(3): P154-8.
- 136 8. Youn YC, Pyun JM, Ryu N, et al. Use of the Clock Drawing Test and the Rey-Osterrieth  
137 Complex Figure Test-copy with convolutional neural networks to predict cognitive impairment.  
138 *Alzheimers Res Ther* 2021; **13**(1): 85.
- 139 9. Ma J, Wang Y, Zhang Y, Zhen X, Guo Q, Shi M. Neuropsychological features in  
140 post-stroke cognitive impairment with no dementia patients with different Traditional Chinese  
141 Medicine syndromes. *J Tradit Chin Med* 2019; **39**(1): 97-102.
- 142 10. Zhong W, Wang F, Chi L, Yang X, Yang Y, Wang Z. Association between Sleep Duration  
143 and Depression among the Elderly Population in China. *Exp Aging Res* 2022; **48**(4): 387-99.  
144
